# Supplementary material for: Dolabelladienols A–C, New Diterpenes Isolated from Brazilian Brown Alga Dictyota pfaffii
Source: PubMed Central journal article supplement (PMC4113826; doi:10.3390/md12074247), 2014-07-23

## Supplementary Information

**Figure S1.**  $^1\text{H}$  NMR data for compound **1** in  $\text{CDCl}_3$ .

**Figure S2.** APT NMR data for compound **1** in  $\text{CDCl}_3$ .

**Figure S3.** COSY spectra for compound **1** in  $\text{CDCl}_3$ .

**Figure S4.** HSQC spectra for compound **1** in  $\text{CDCl}_3$ .

**Figure S5.** HMBC spectra for compound **1** in  $\text{CDCl}_3$ .

**Figure S6.** NOESY spectra for compound **1** in  $\text{CDCl}_3$ .

**Figure S7.**  $^1\text{H}$  NMR of compound **2** (500 MHz in  $\text{CDCl}_3$ ).

**Figure S8.** NMR APT spectra for compound **2** (125 MHz in  $\text{CDCl}_3$ ).

**Figure S9.** COSY spectra for compound **2** in  $\text{CDCl}_3$ .

**Figure S10.** HSQC spectra for compound **2** in  $\text{CDCl}_3$ .

**Figure S11.** HMBC spectra for compound **2** in  $\text{CDCl}_3$ .

**Figure S12.** NOESY spectra for compound **2** in  $\text{CDCl}_3$ .

**Figure S13.**  $^1\text{H}$  NMR of compound **3** (500 MHz in  $\text{CDCl}_3$ ).

**Figure S14.** NMR APT spectra for compound **3** (125 MHz in  $\text{CDCl}_3$ ).

**Figure S15.** COSY spectra for compound **3** in  $\text{CDCl}_3$ .

**Figure S17.** HMBC spectra for compound **3** in  $\text{CDCl}_3$ .

**Figure S1.**  $^1\text{H}$  NMR of compound **1** (500 MHz in  $\text{CDCl}_3$ ).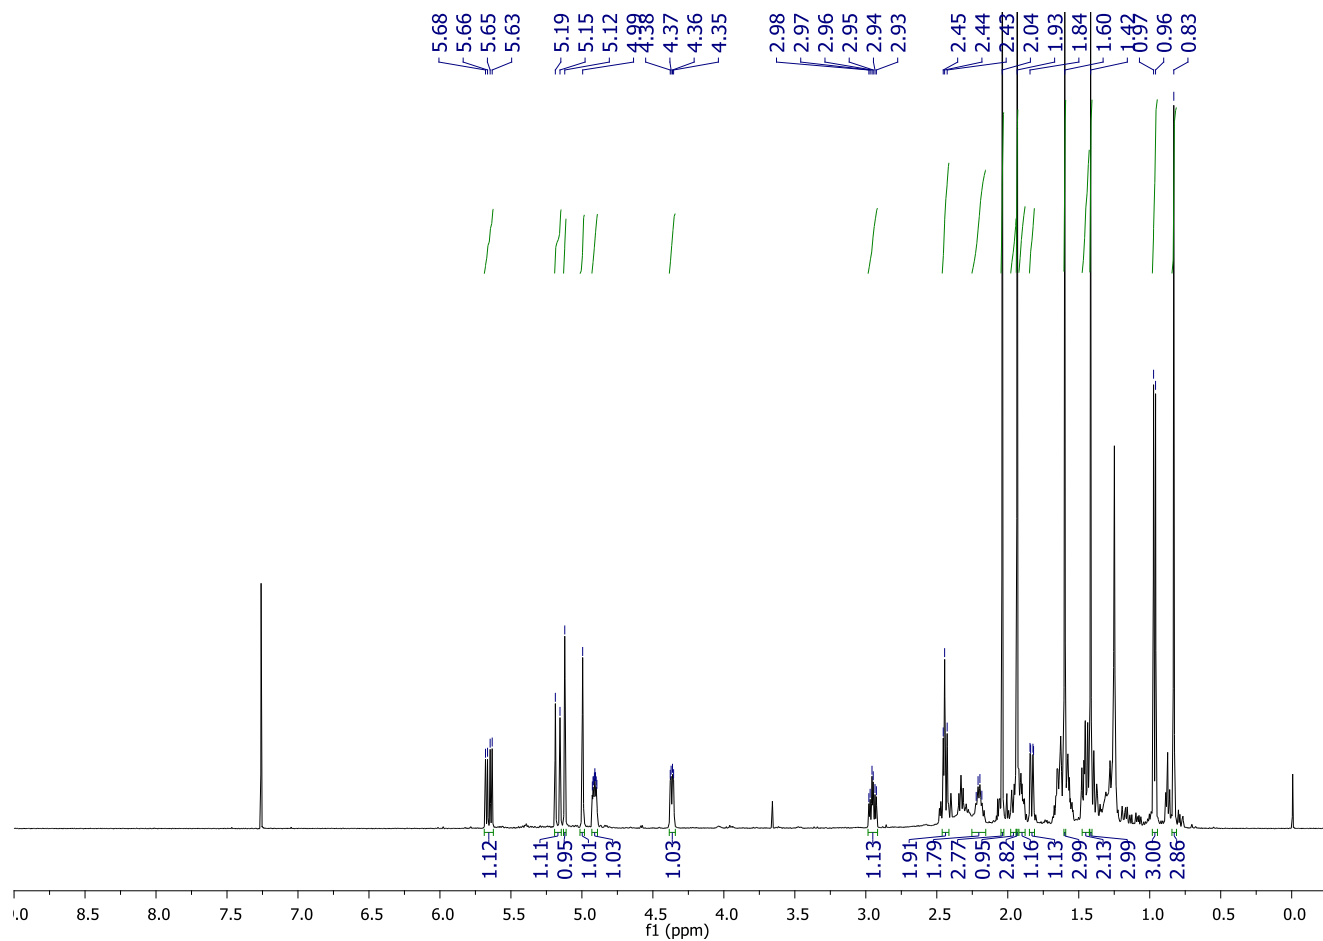

**Figure S2.** NMR APT spectra for compound **1** (125 MHz/ $\text{CDCl}_3$ ).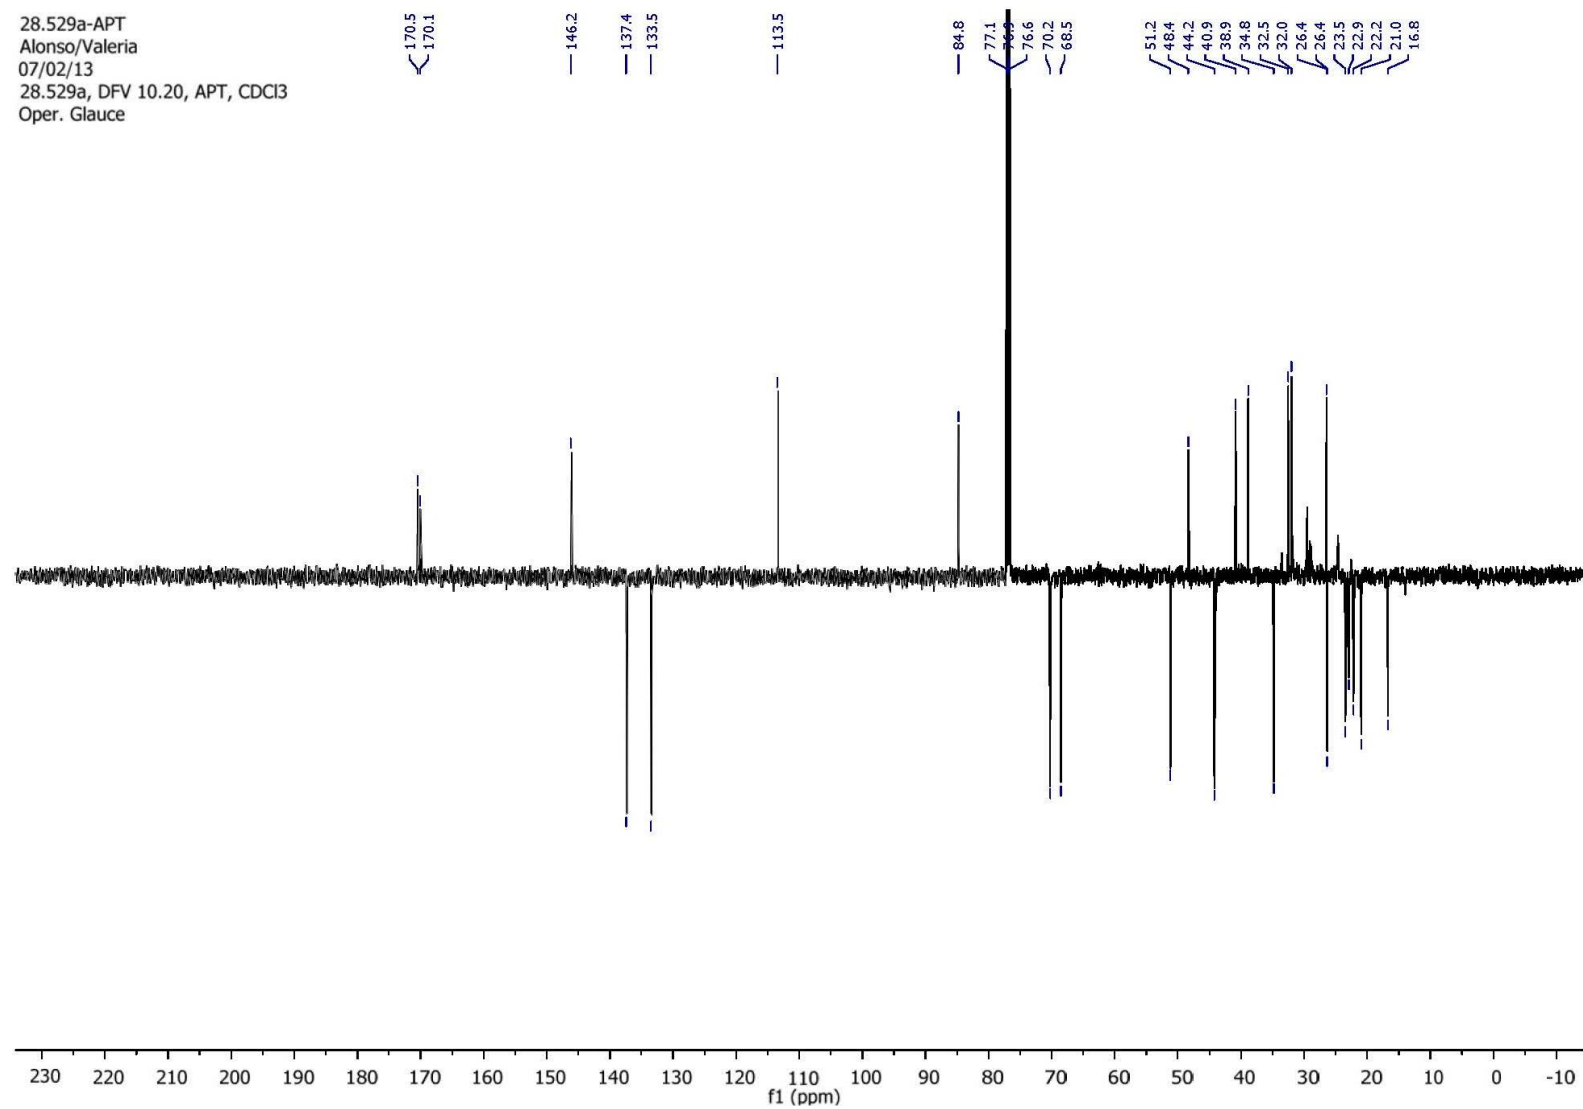

Figure S3. COSY spectra for compound 1 in CDCl<sub>3</sub>.

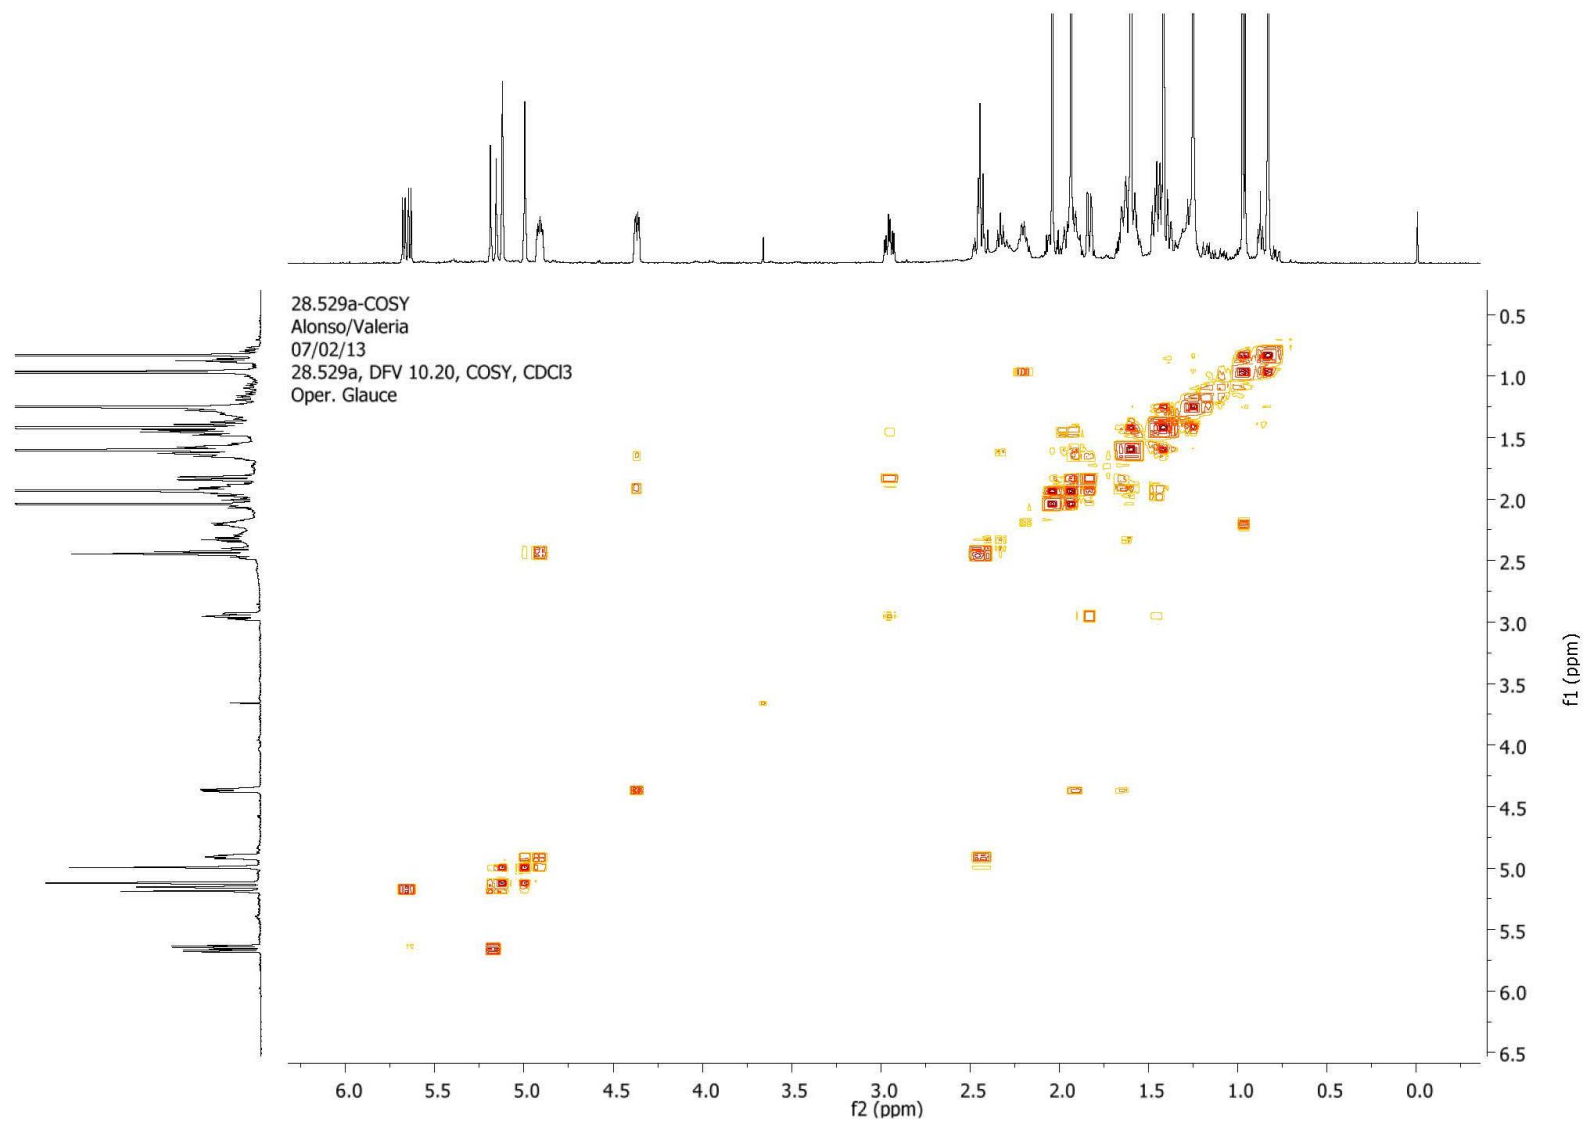

Figure S4. HSQC spectra for compound 1 in CDCl<sub>3</sub>.

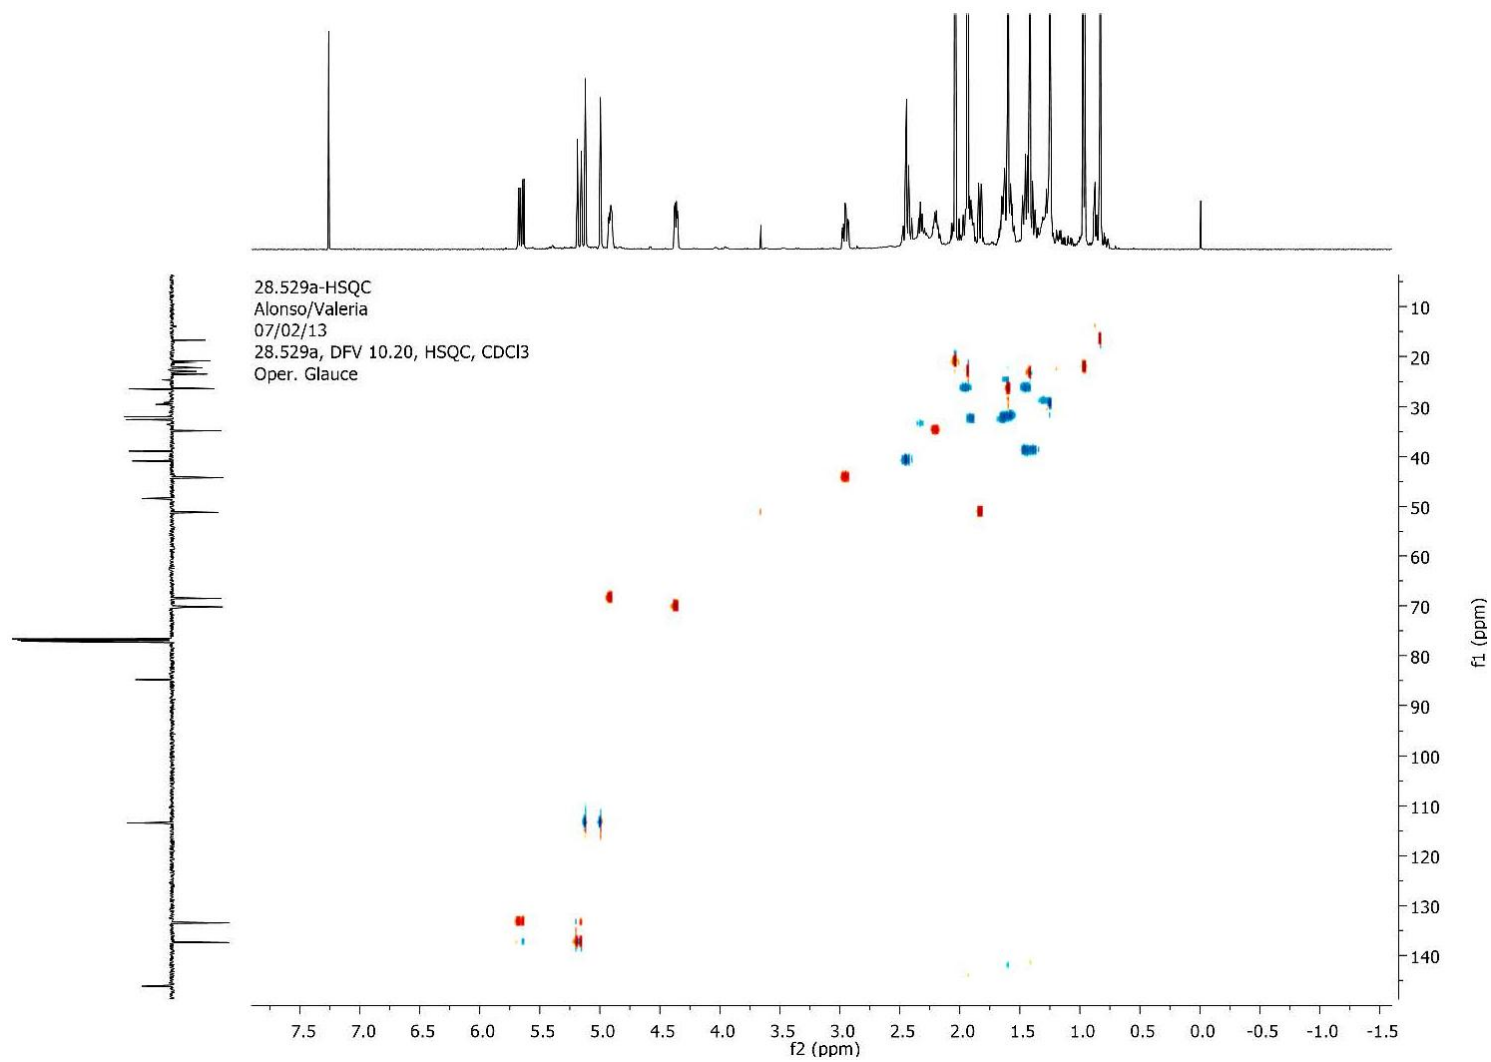

Figure S5. HMBC spectra for compound 1 in CDCl<sub>3</sub>.

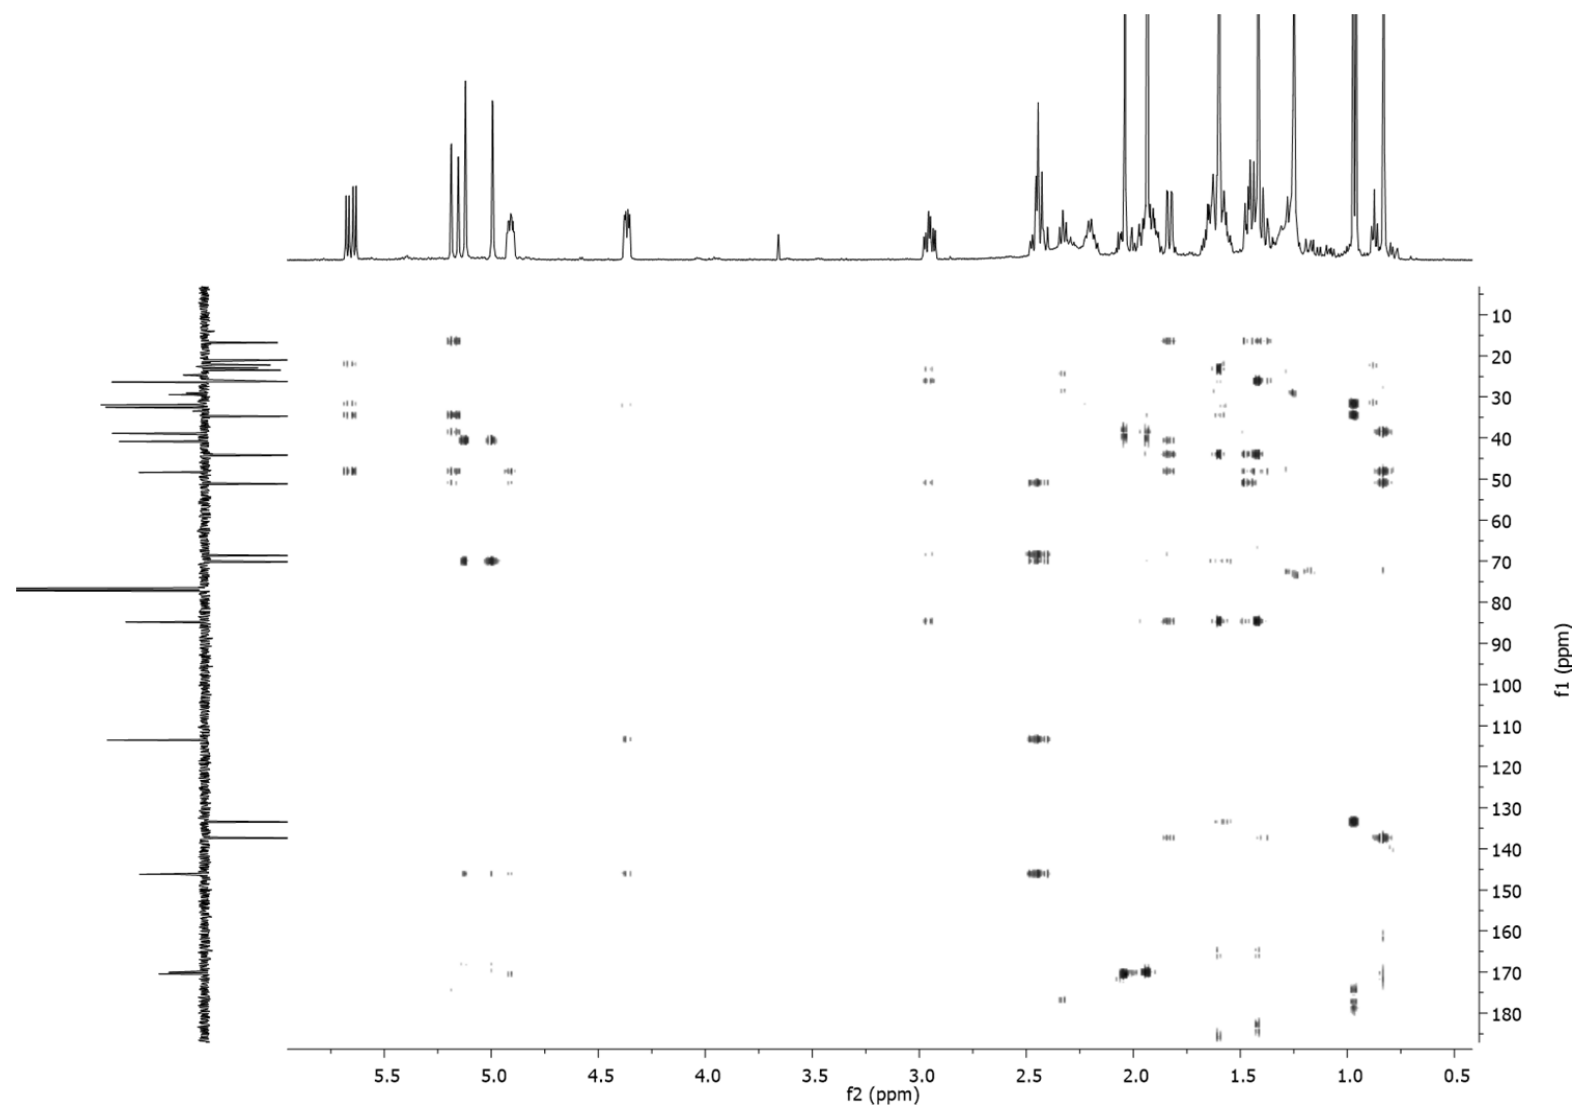

Figure S6. NOESY spectra for compound 1 in CDCl<sub>3</sub>.

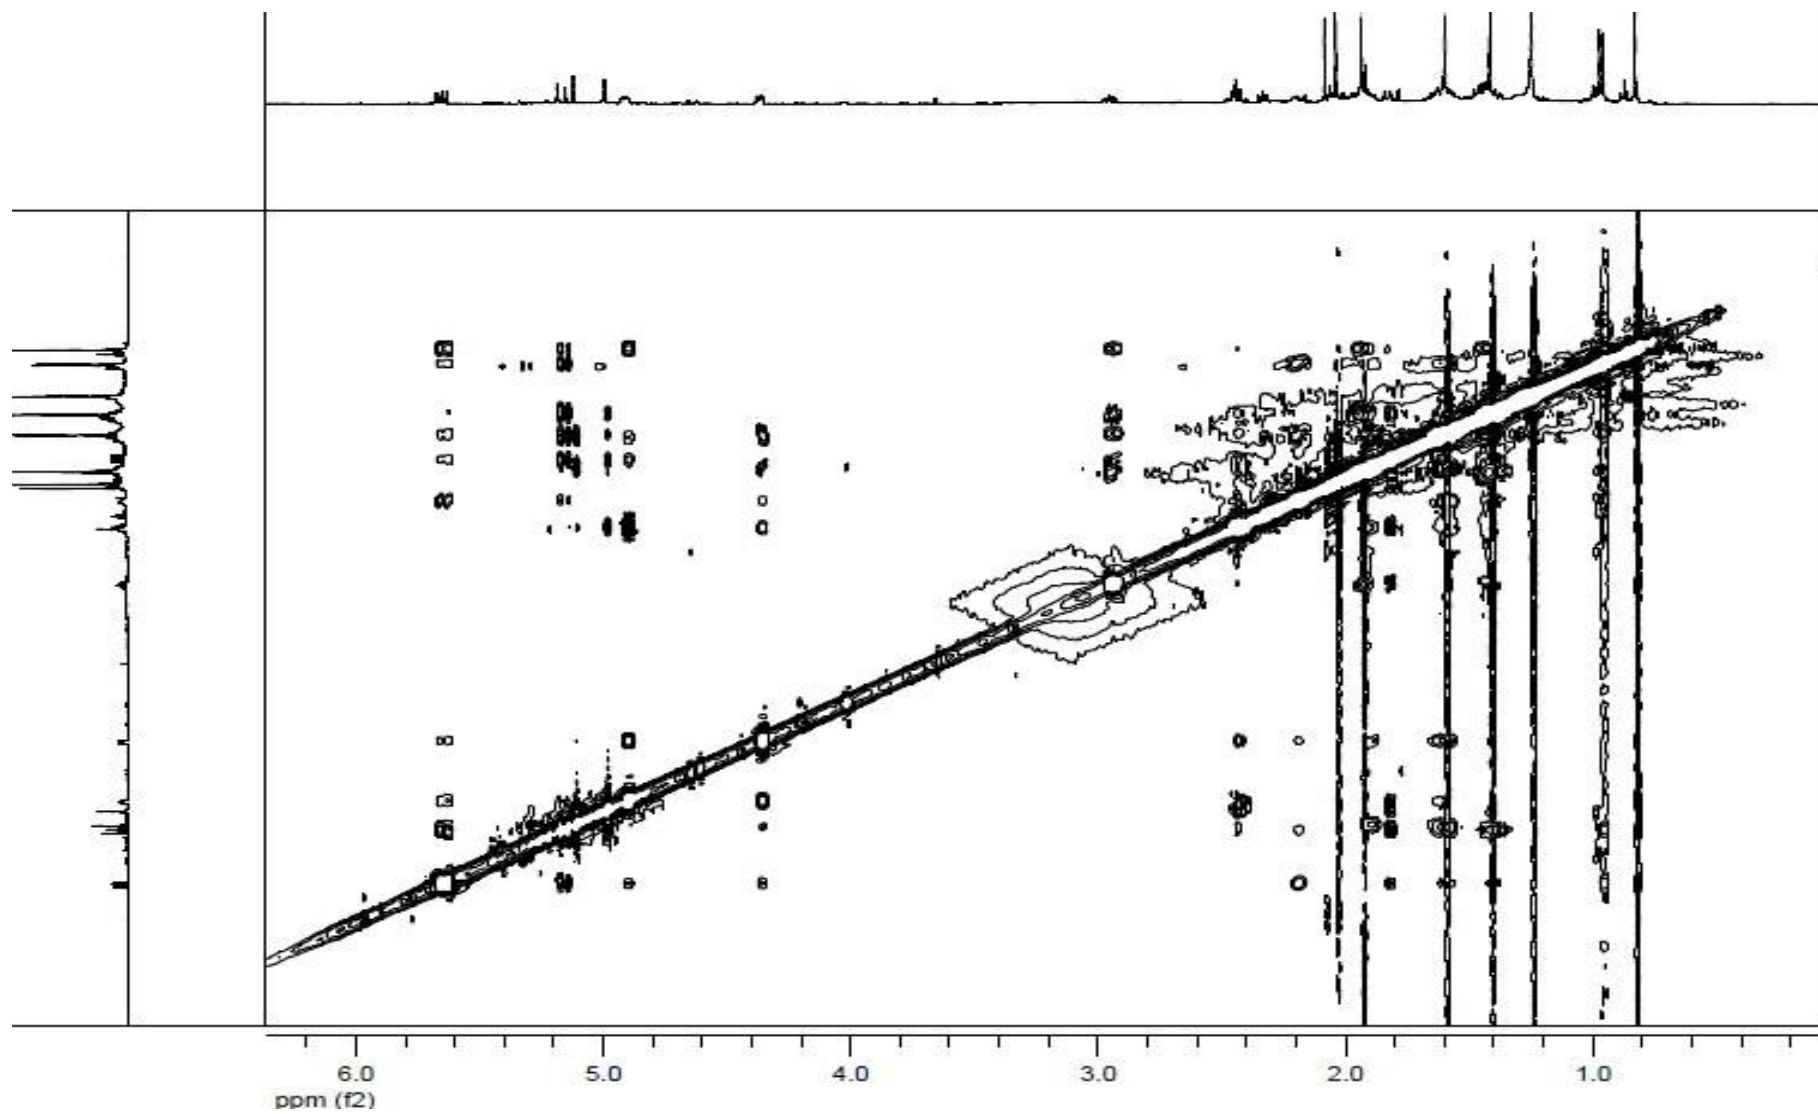

**Figure S7.**  $^1\text{H}$  NMR of compound **2** (500 MHz in  $\text{CDCl}_3$ ).

28.650a-1H  
Alonso/Valeria  
27/11/12  
28.650a, Dol Novo F2, 1H,  $\text{CDCl}_3$   
Oper.Glauce

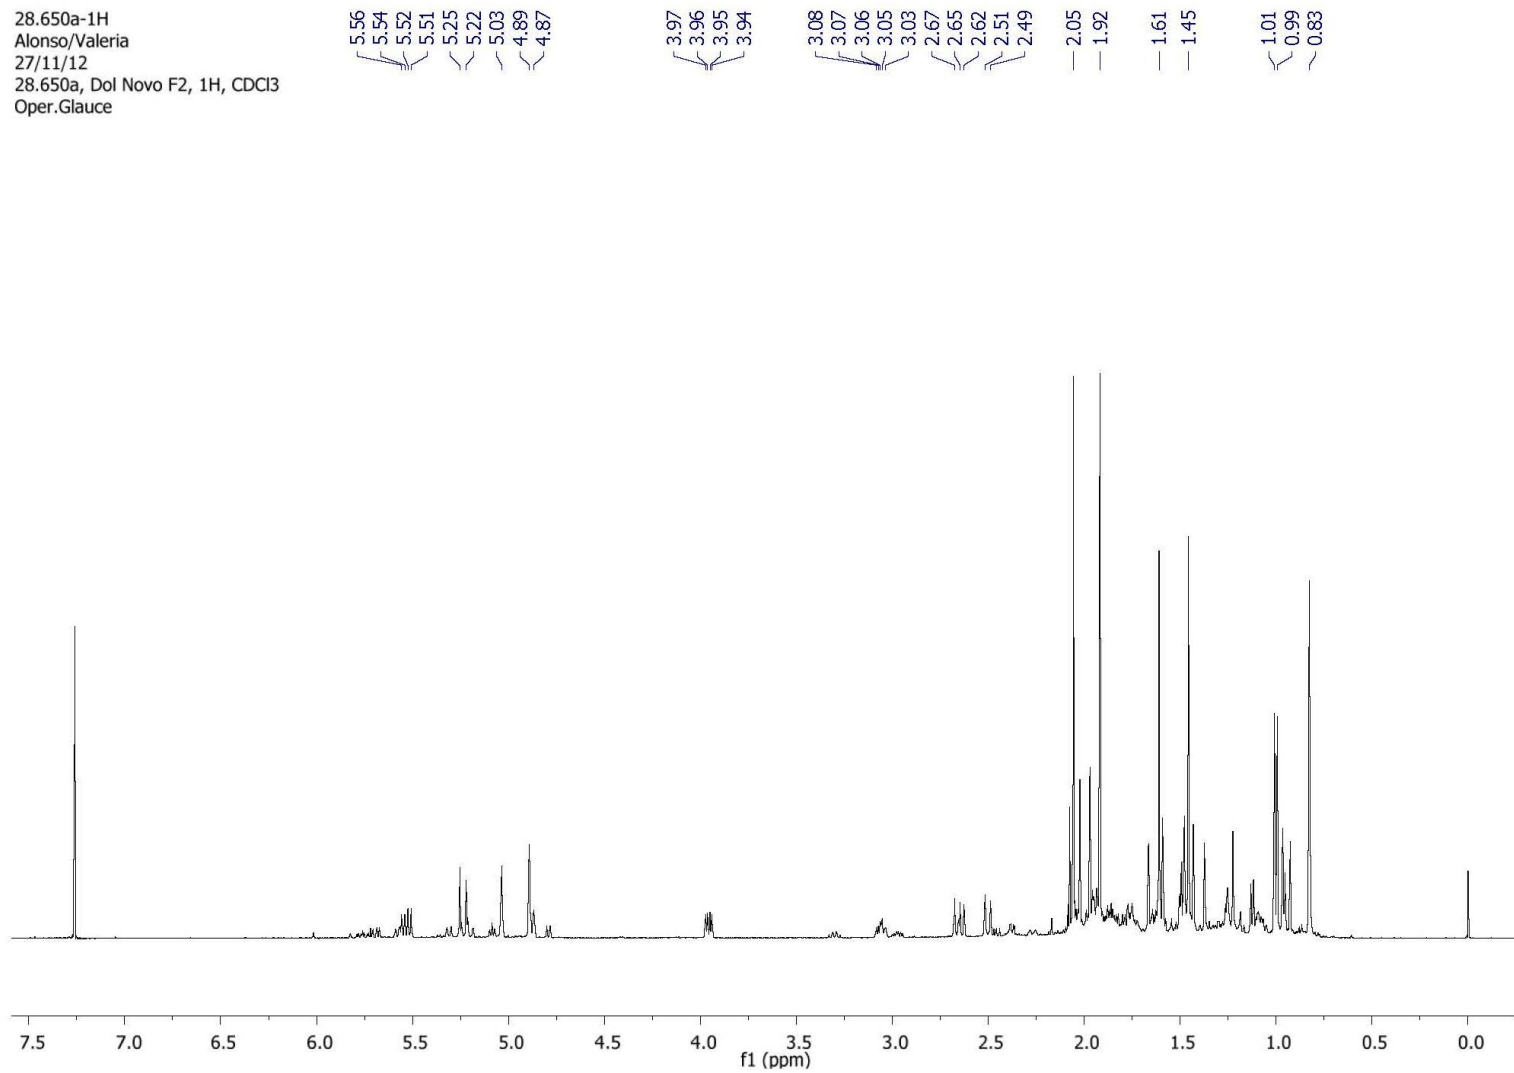



**Figure S8.** NMR APT spectra for compound **2** (125 MHz in CDCl<sub>3</sub>).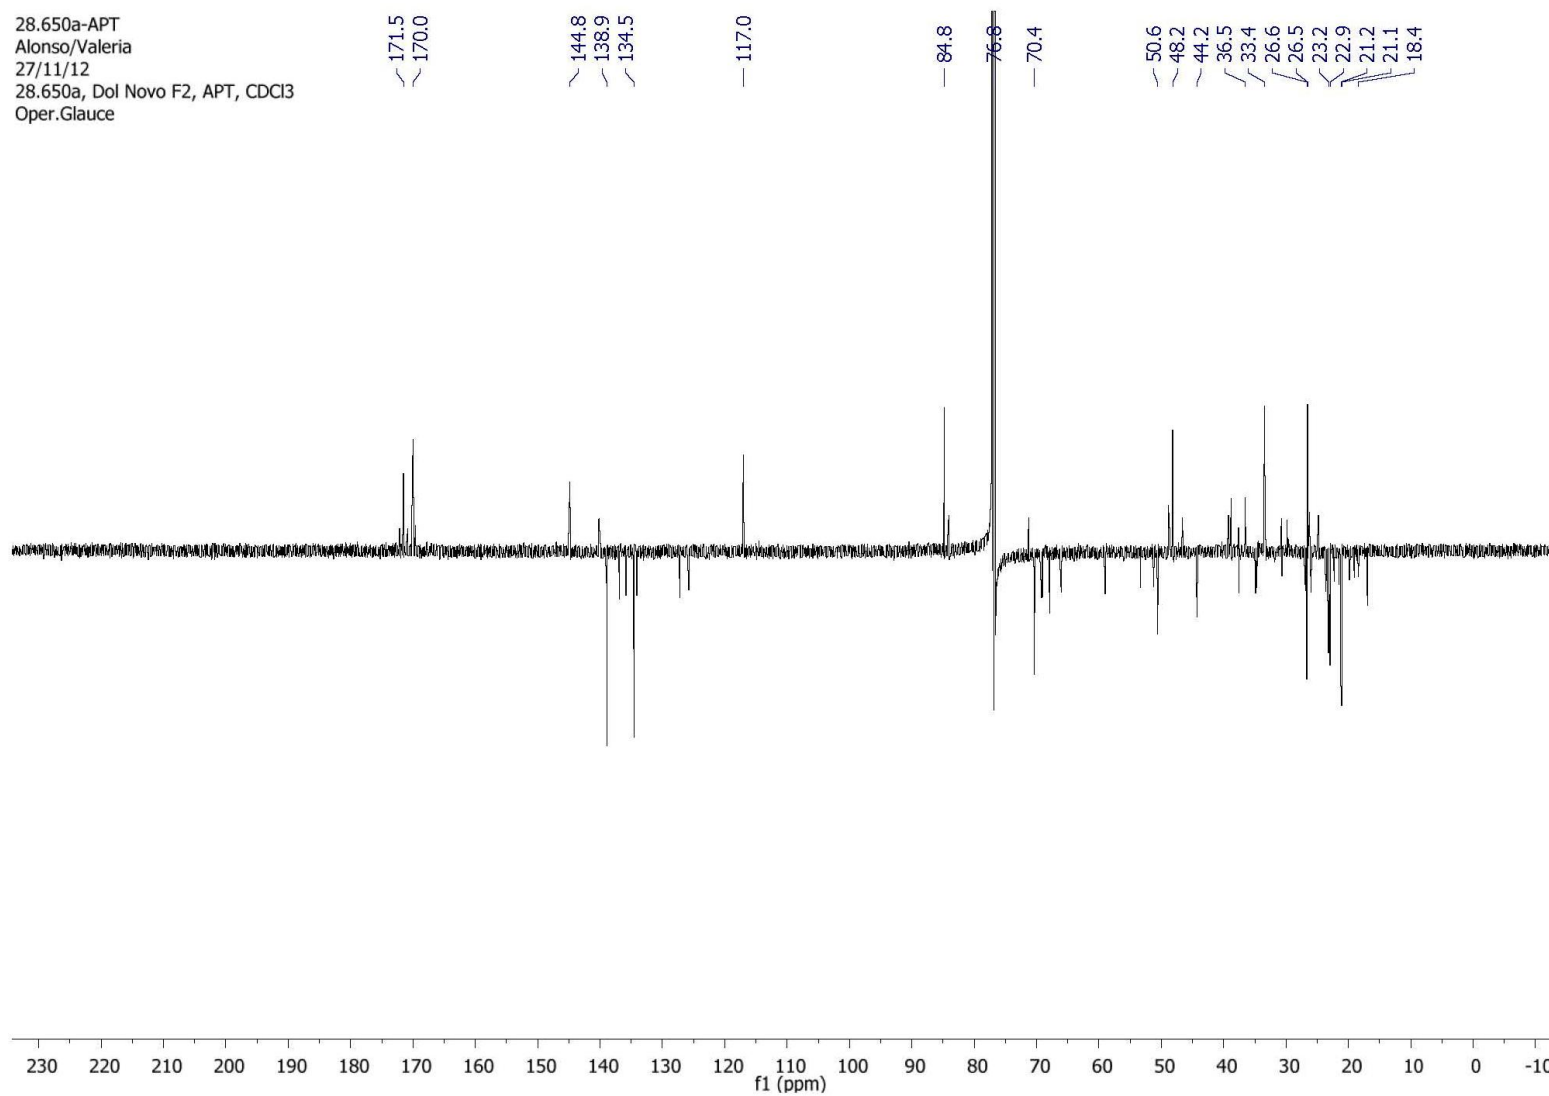

Figure S9. COSY spectra for compound 2 in CDCl<sub>3</sub>.

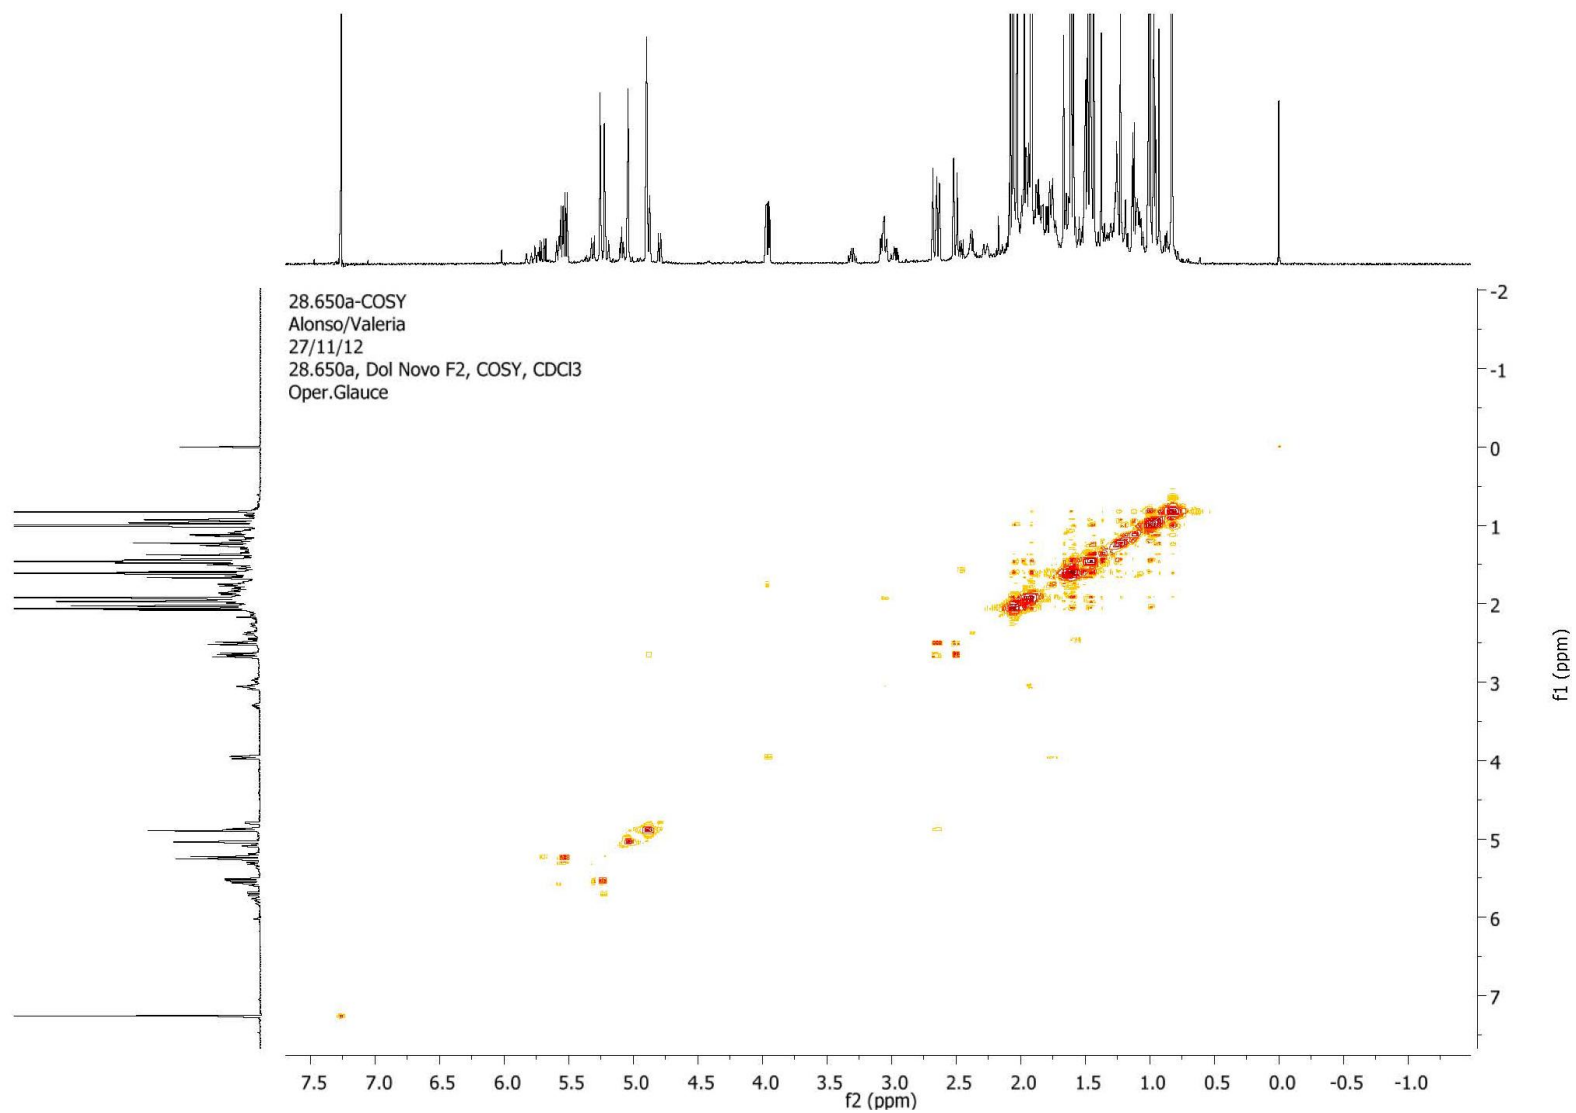

Figure S10. HSQC spectra for compound 2 in CDCl<sub>3</sub>.

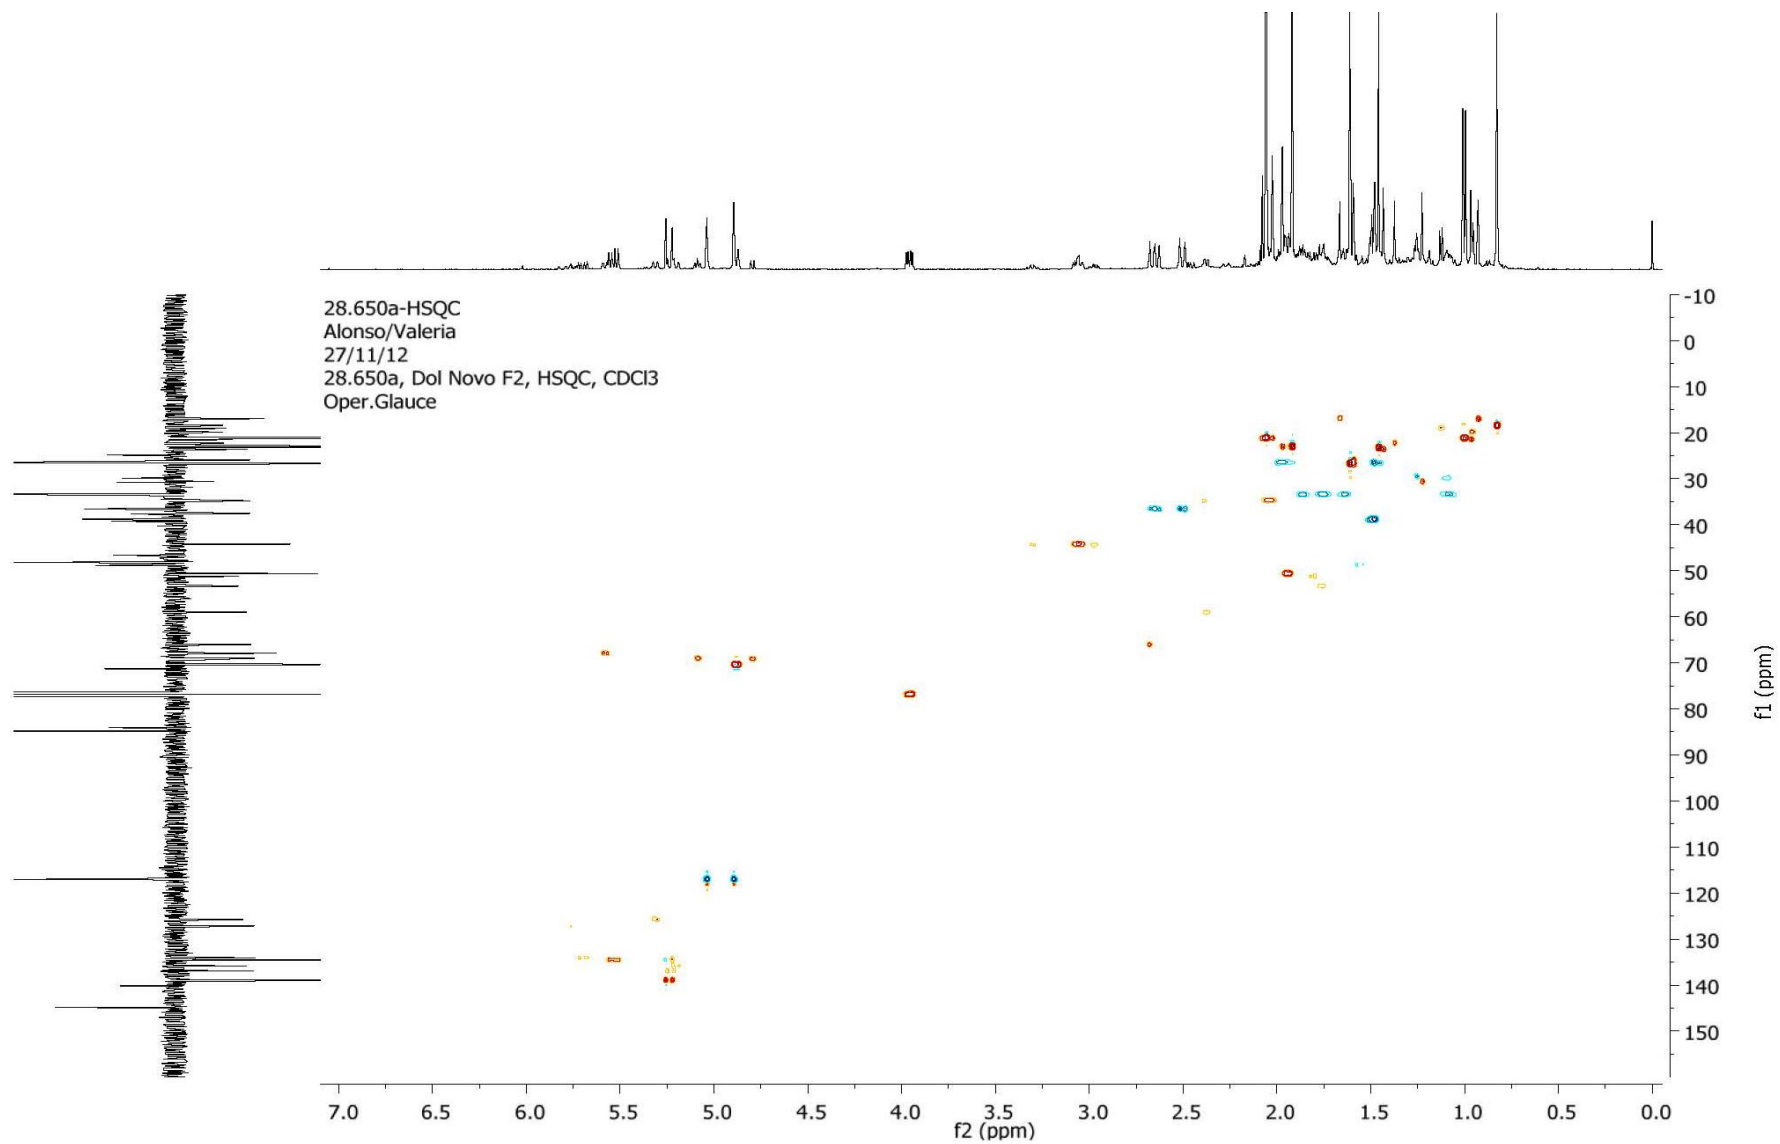

Figure S11. HMBC spectra for compound 2 in CDCl<sub>3</sub>.

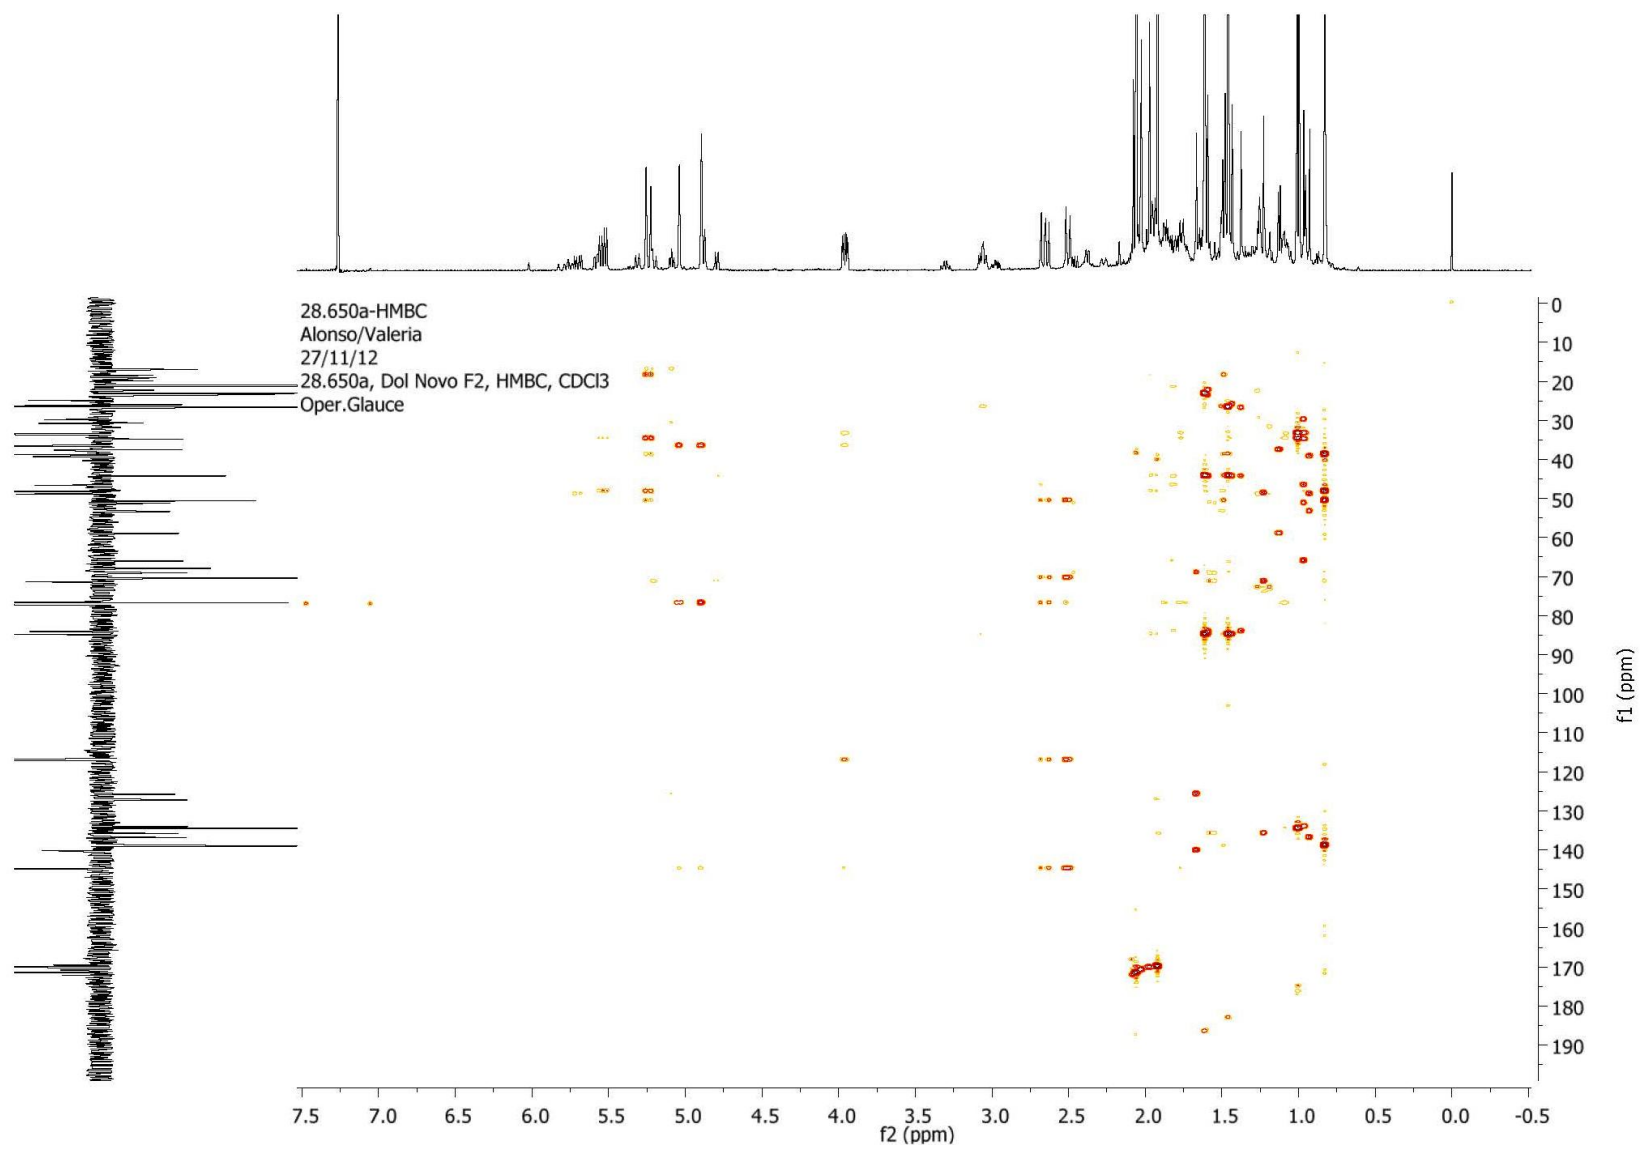

Figure S12. NOESY spectra for compound 2 in CDCl<sub>3</sub>.

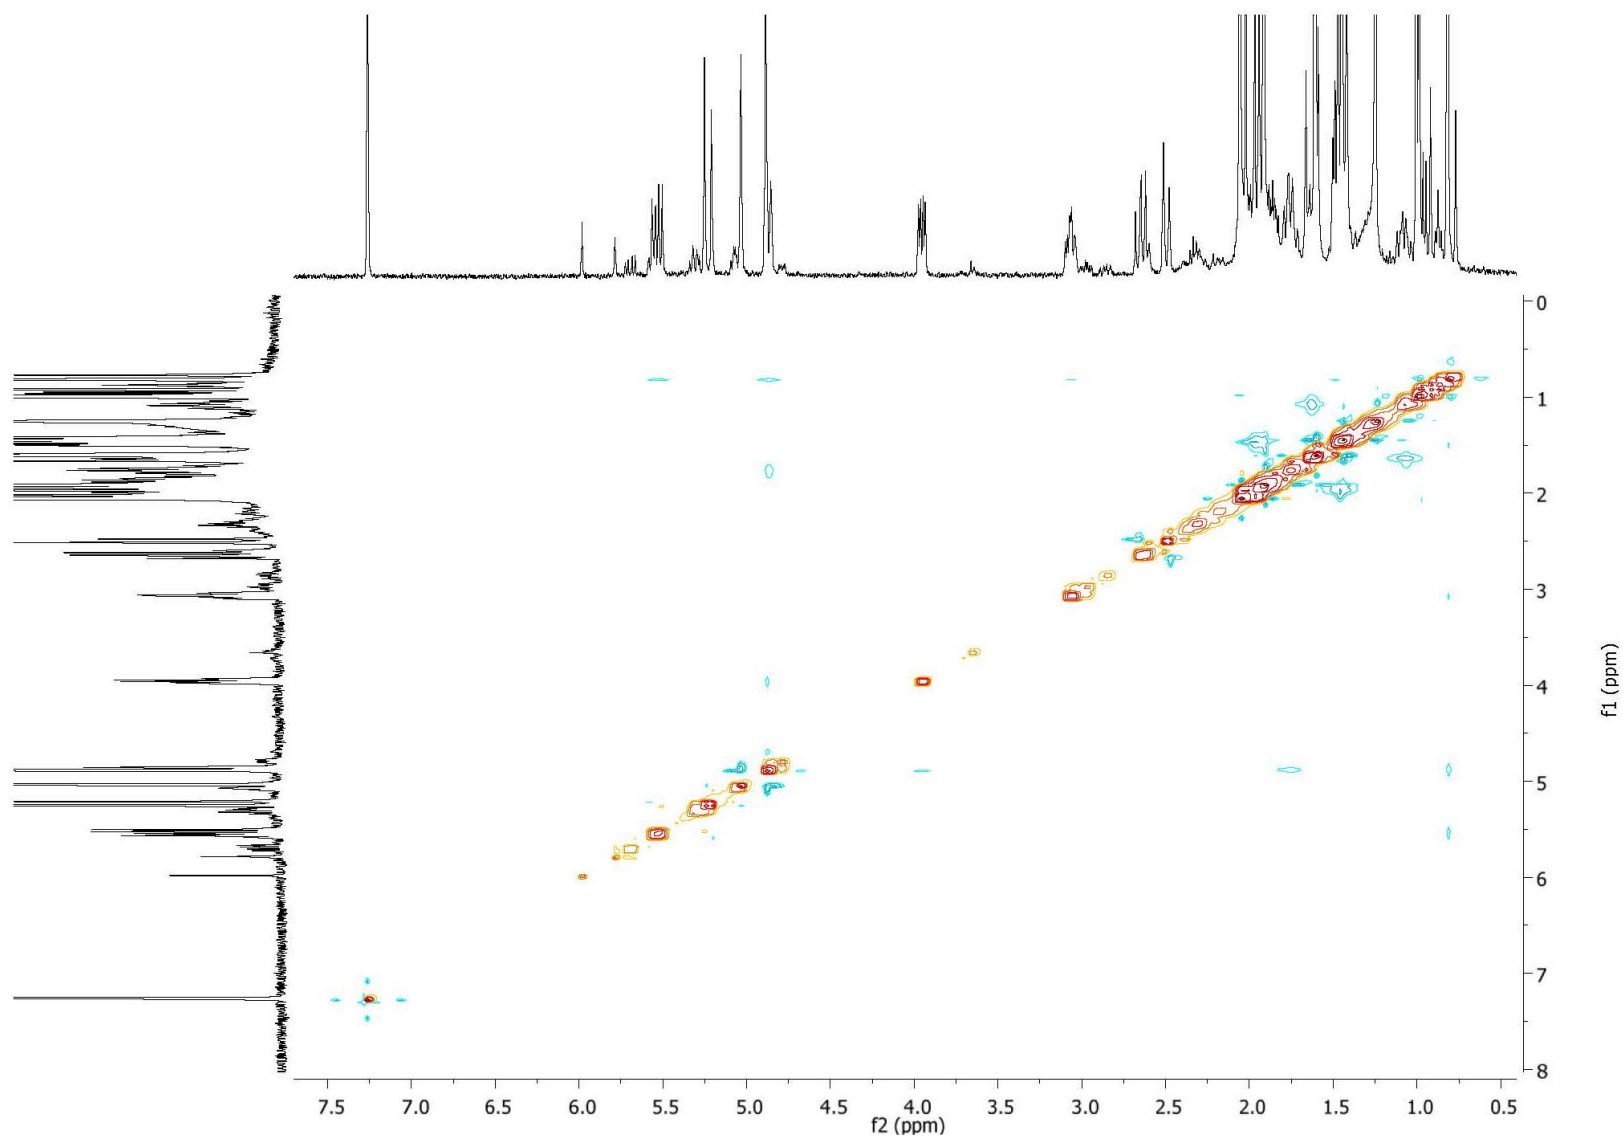

**Figure S13.**  $^1\text{H}$  NMR of compound **3** (500 MHz in  $\text{CDCl}_3$ ).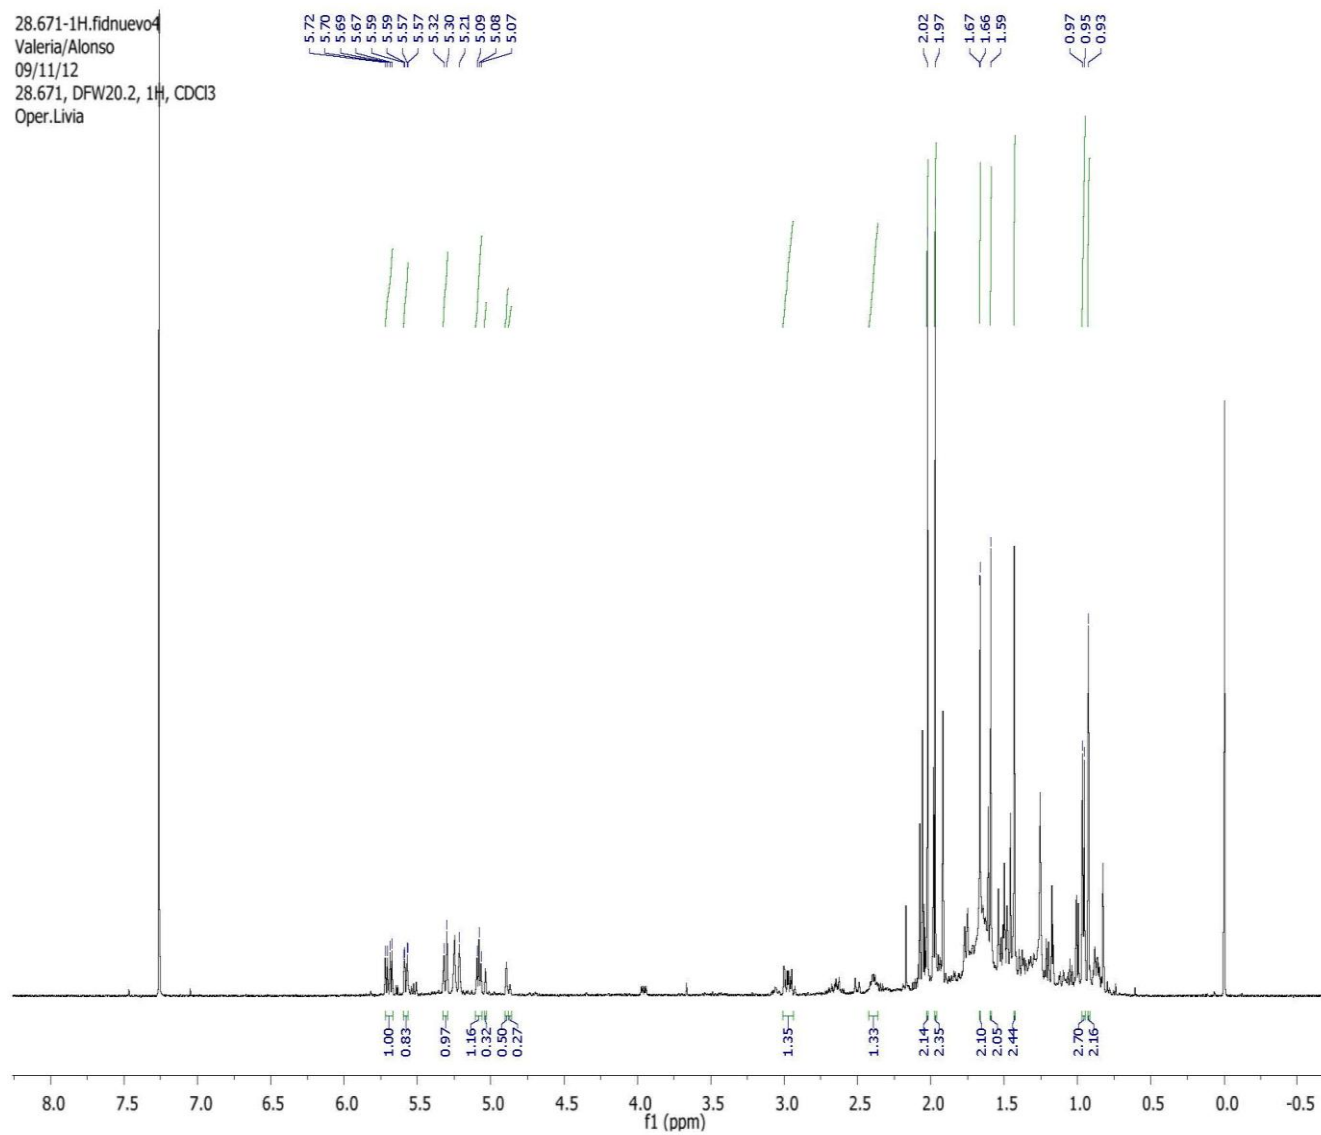

**Figure S14.** NMR APT spectra for compound **3** (125 MHz in  $\text{CDCl}_3$ ).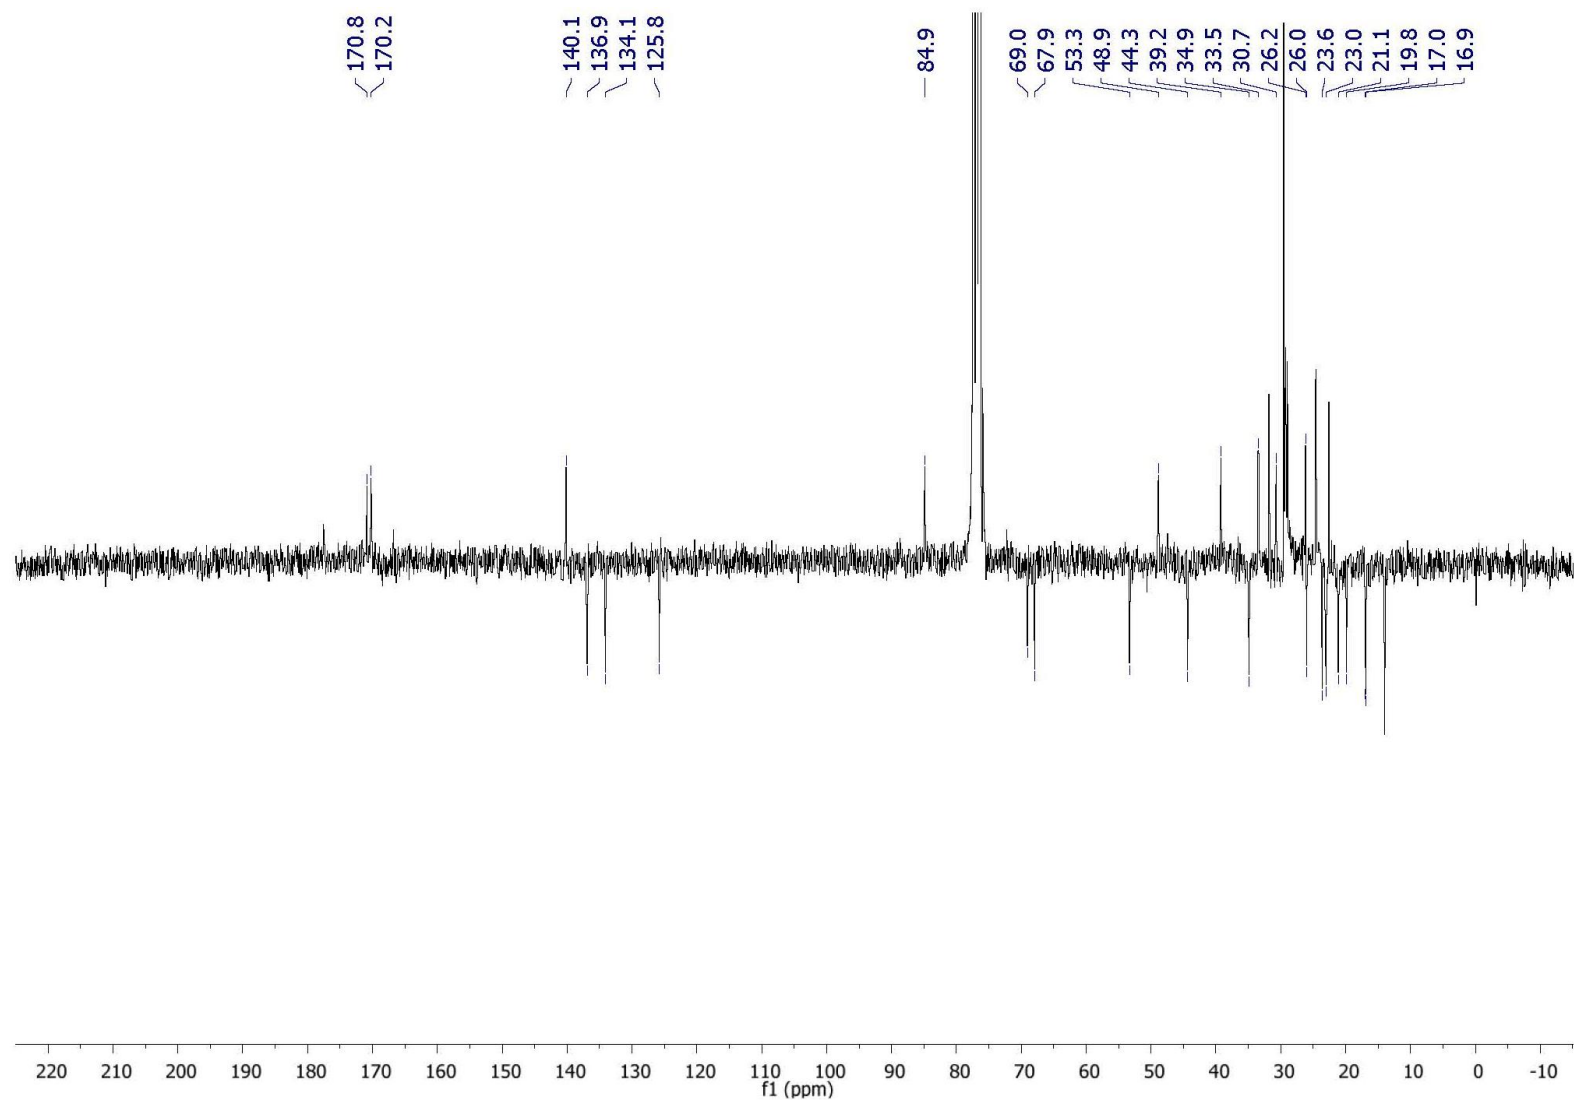

Figure S15. COSY spectra for compound 3 in CDCl<sub>3</sub>.

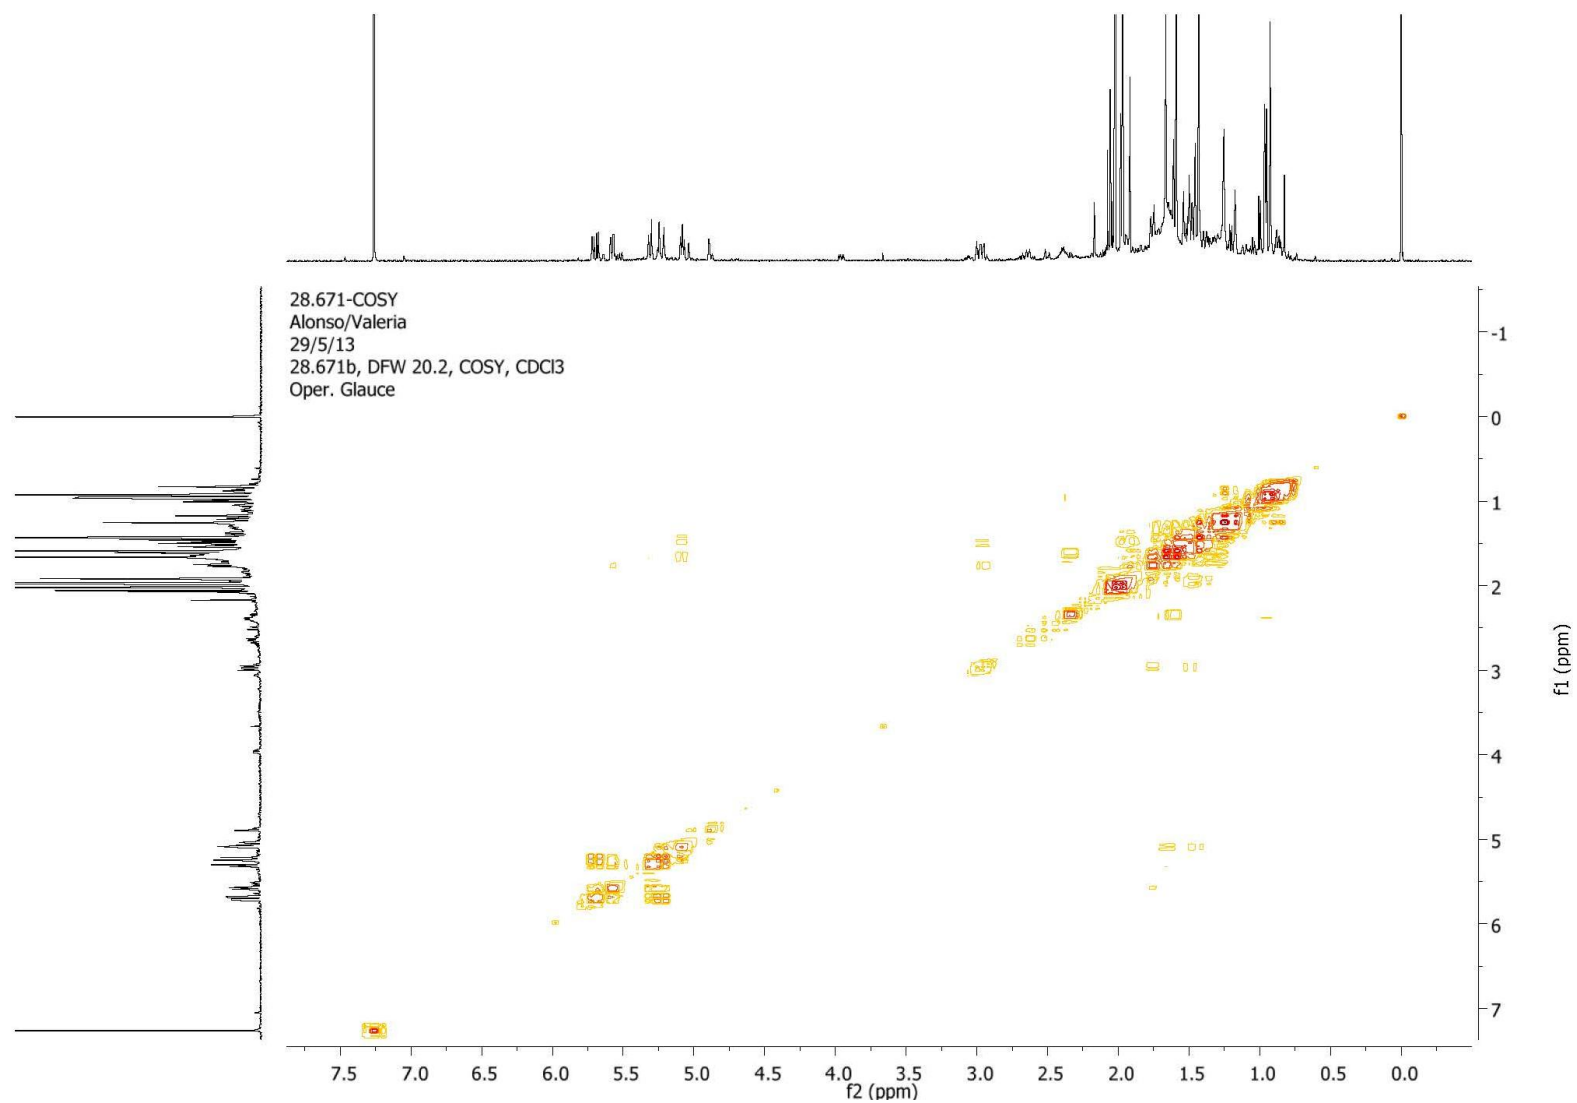



Figure S16. HSQC spectra for compound 3 in CDCl<sub>3</sub>.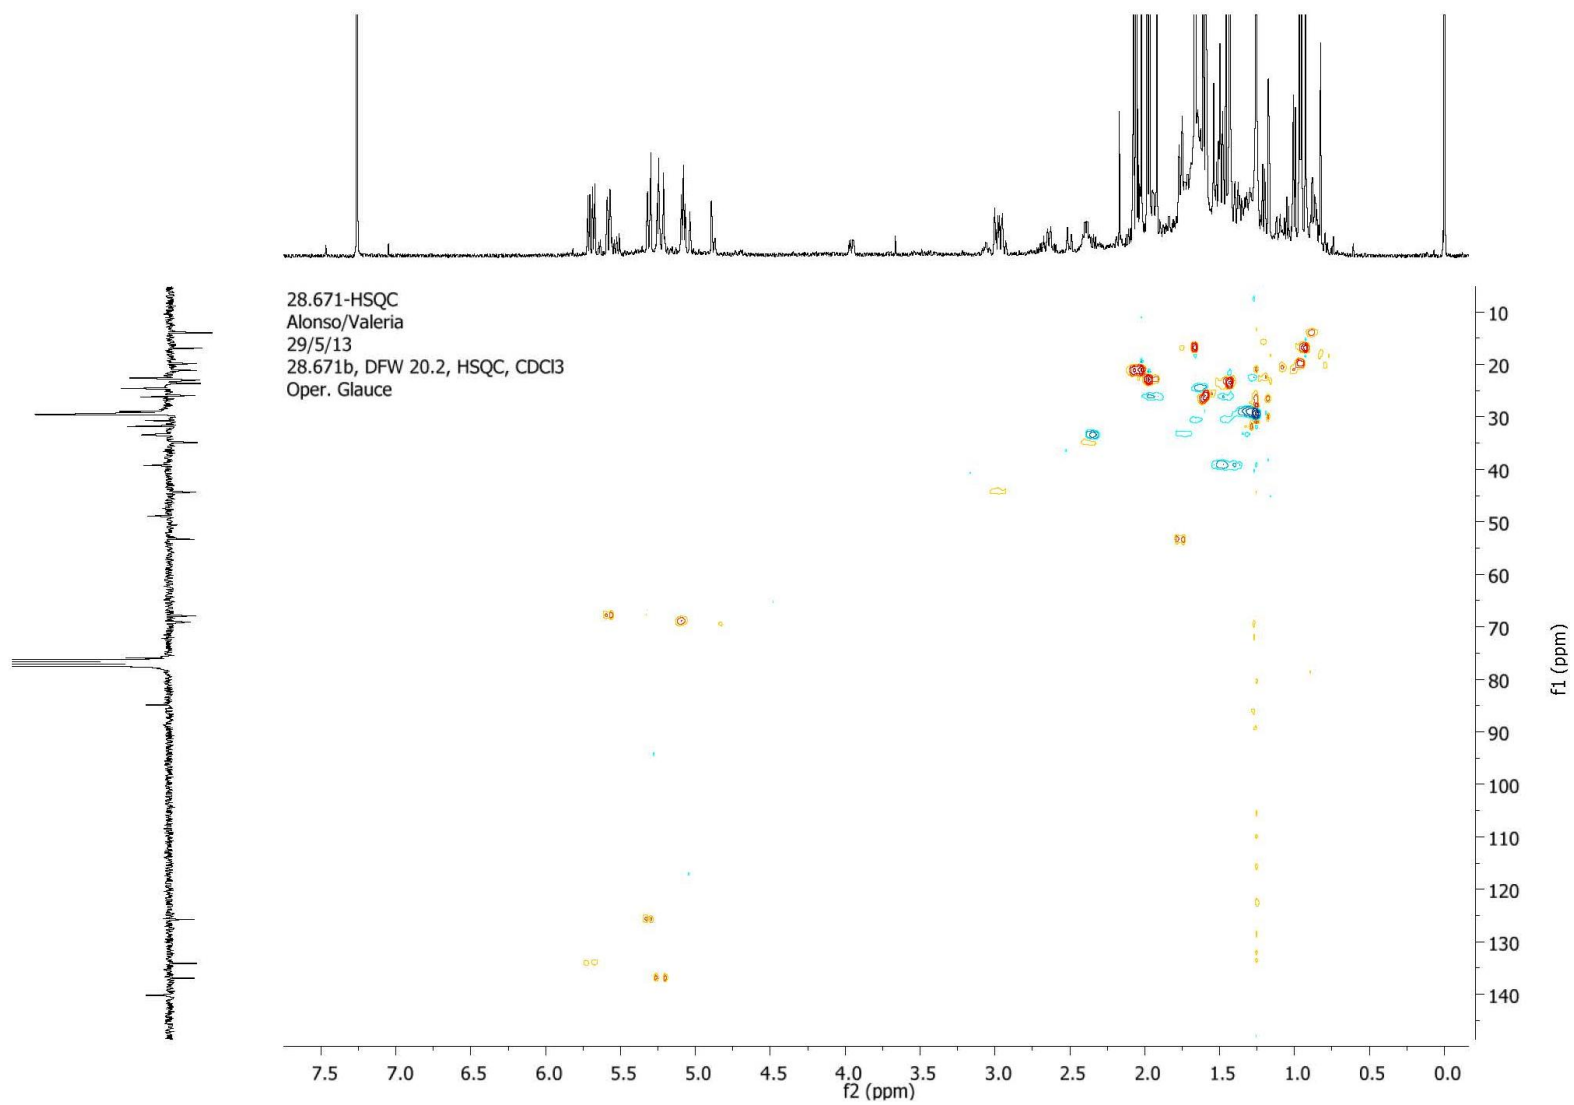

Figure S17. HMBC spectra for compound 3 in CDCl<sub>3</sub>.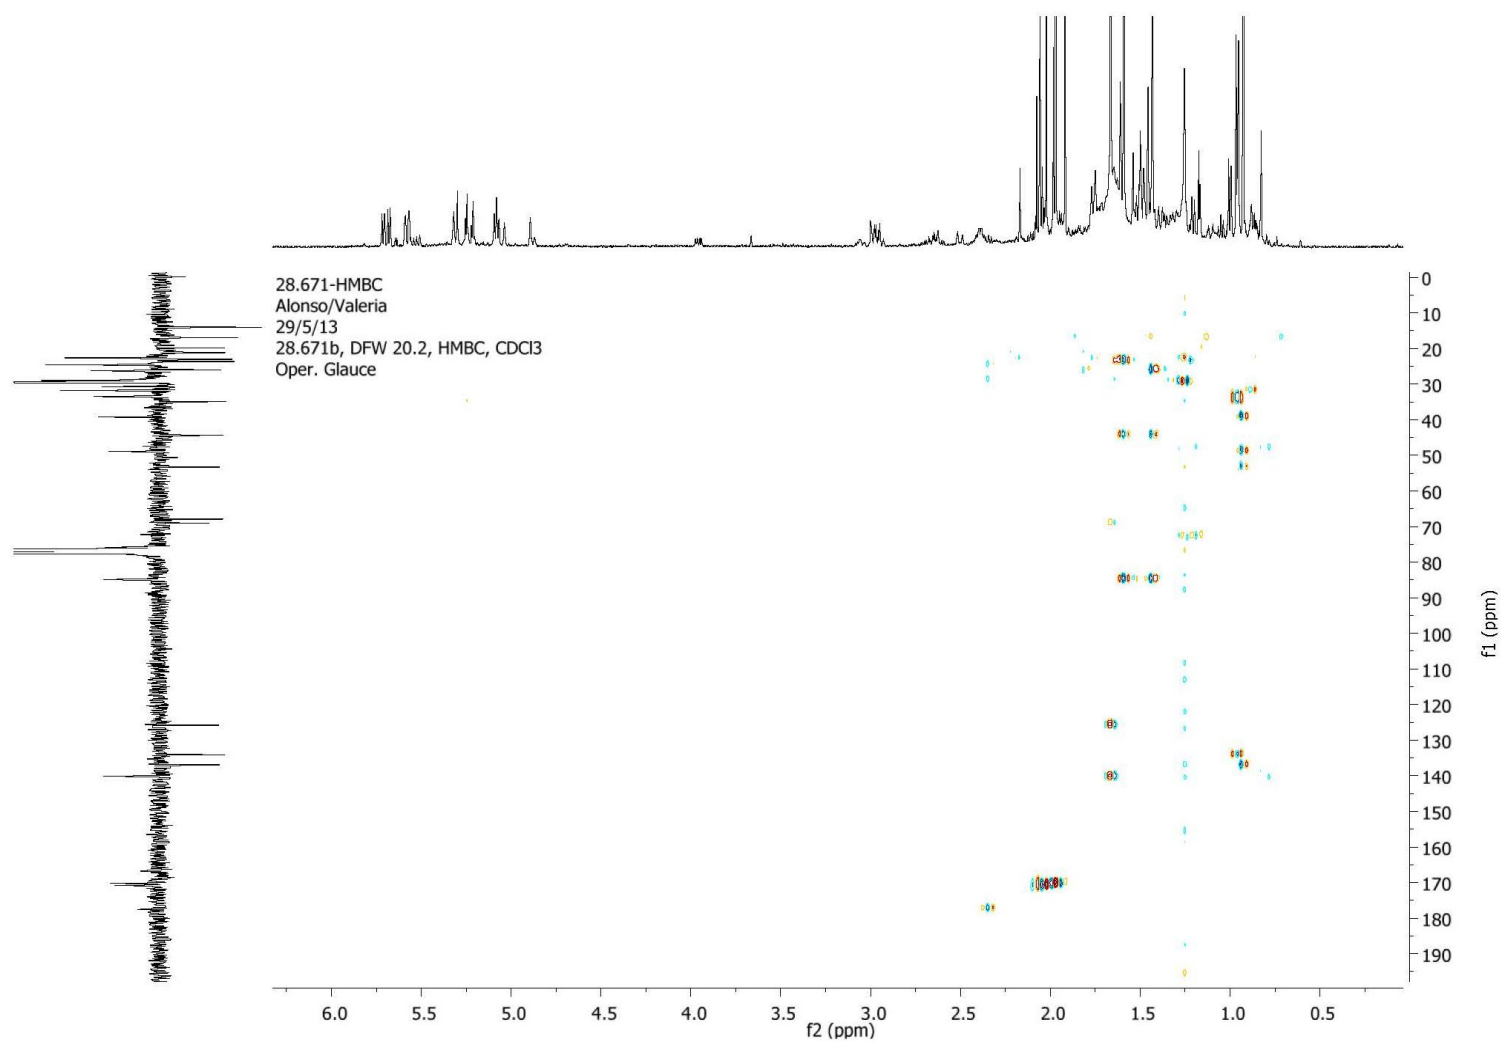

Supplement: marinedrugs-12-04247-s001.pdf [file marinedrugs-12-04247-s001.pdf]
